# Supplementary material for: Surface Modification of ZnO Nanorods with Hamilton Receptors
Source: PubMed Central journal article supplement (PMC4425075; doi:10.3390/ijms16048186), 2015-04-13
Supplement: ijms-16-08186-s001.pdf [file ijms-16-08186-s001.pdf]

# Supplementary Information

## (1) Synthesis and Characterization

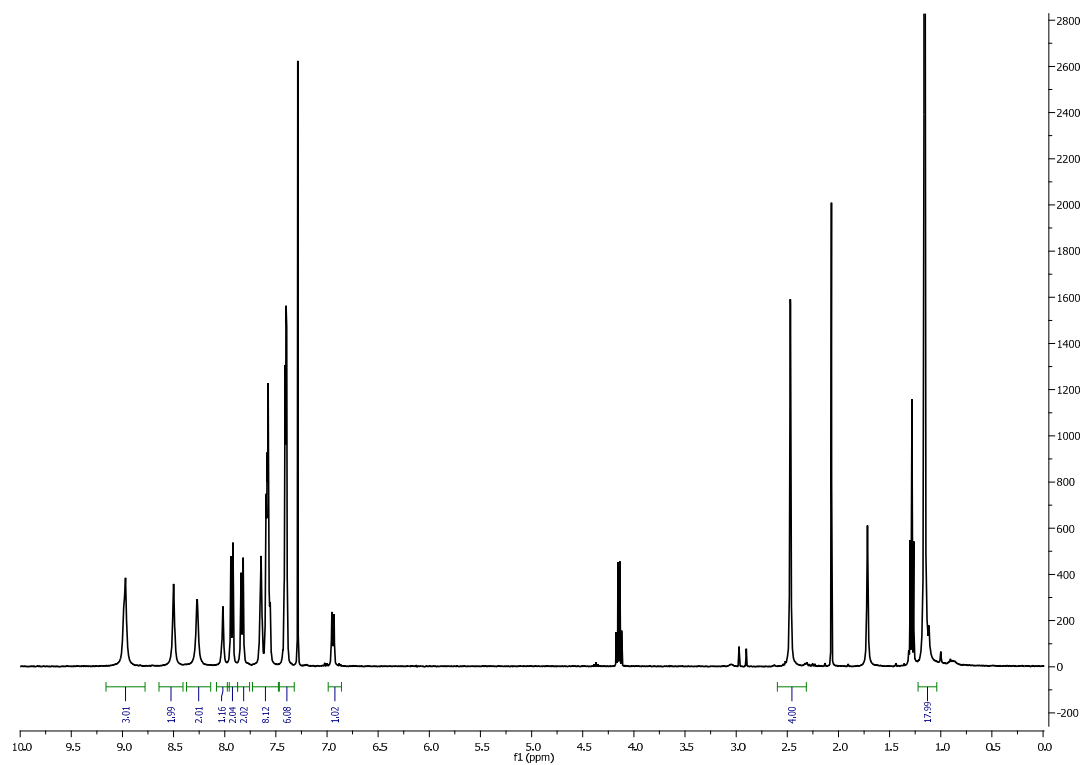

Figure S1.  $^1\text{H-NMR}$  of **3** (400 MHz;  $\text{CDCl}_3$ ; rt).

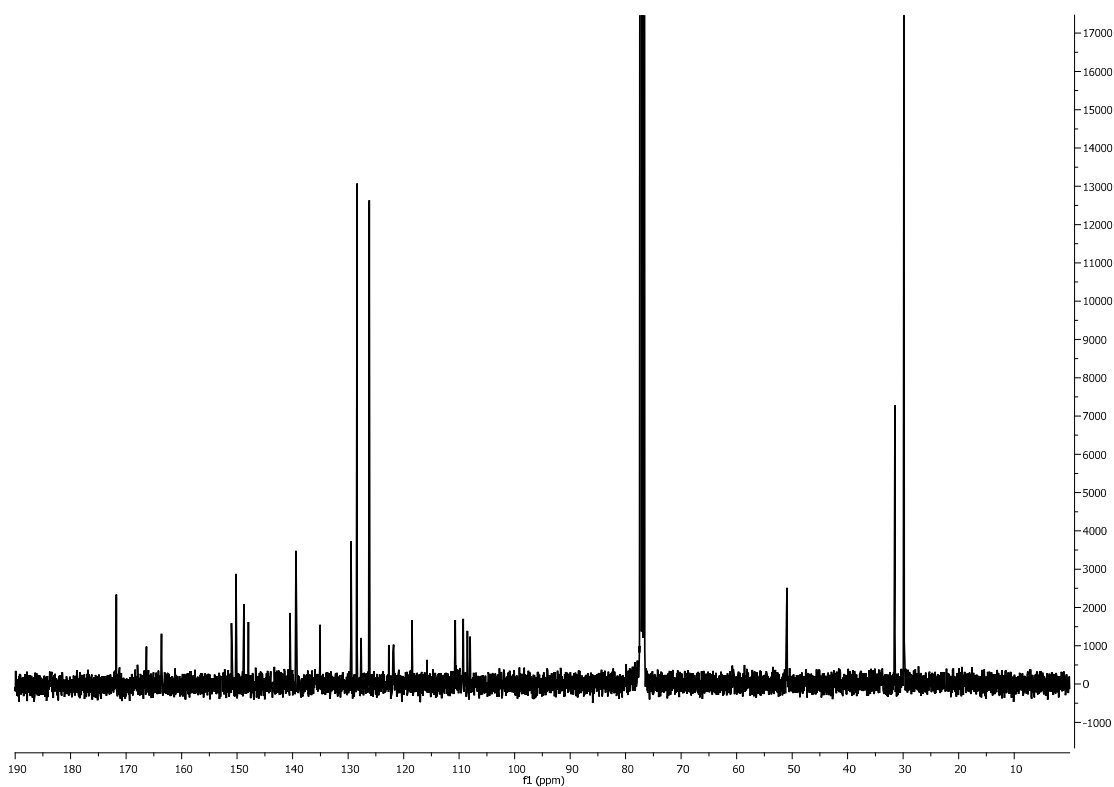

Figure S2.  $^{13}\text{C-NMR}$  of **3** (100 MHz;  $\text{CDCl}_3$ ; rt).

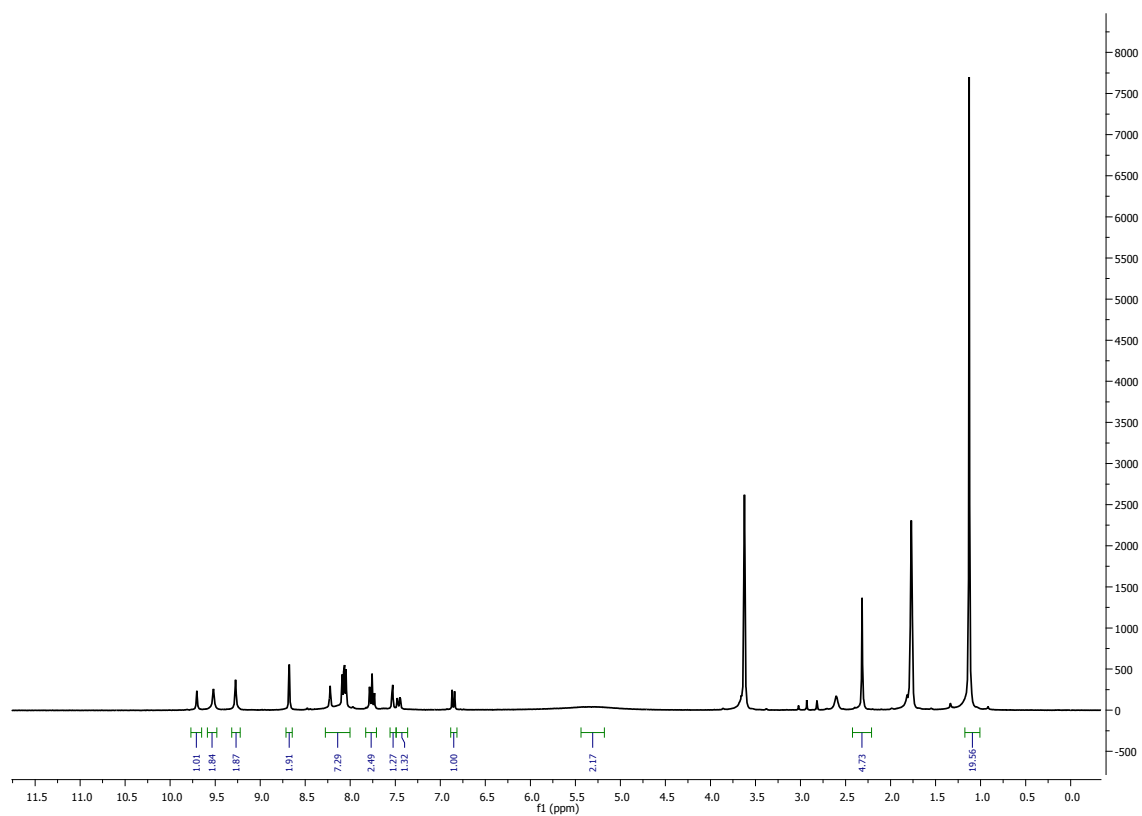

**Figure S3.** <sup>1</sup>H-NMR of 4 (400 MHz; THF-*d*<sub>8</sub>; rt).

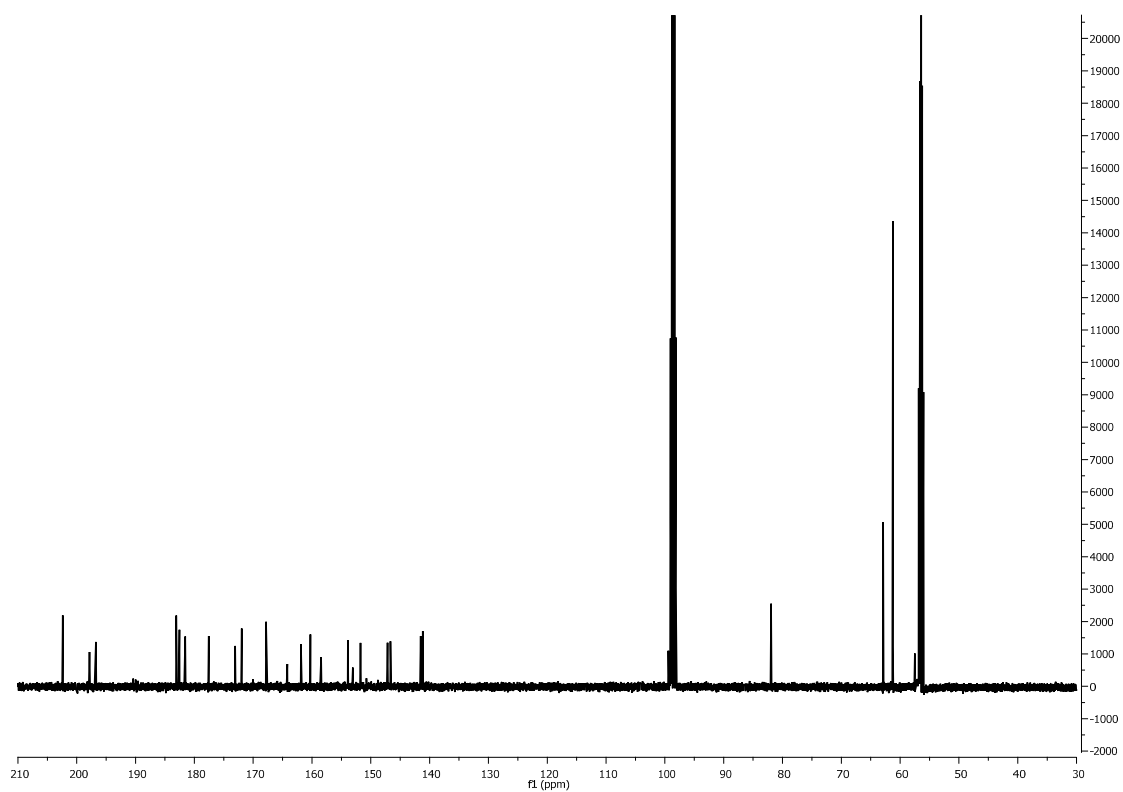

**Figure S4.** <sup>13</sup>C-NMR of 4 (100 MHz; THF-*d*<sub>8</sub>; rt).

## Synthesis and Characterization of 5

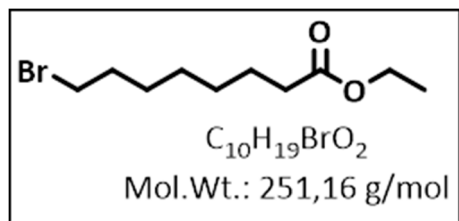

0.90 g (4.00 mmol) 8-Bromooctanoic acid was dissolved in 30 mL ethanol. Then 3 mL sulfuric acid were added. The mixture was heated at reflux temperature for 12 h and allowed to cool down to rt. 50 mL Water was added and the product extracted with diethyl ether. The organic phase was washed with brine and dried with  $MgSO_4$ . Evaporation of the solvent gave Ethyl 8-bromooctanoate. Yield: 0.96 g (3.80 mmol; 95%).  $^1H$ -NMR ( $CDCl_3$ , 400 MHz, rt):  $\delta$  [ppm] = 1.23 (t,  $^3J = 7.1$  Hz, 3H,  $CH_3$ ), 1.30 (m, 6H,  $CH_2$ ), 1.60 (m, 2H,  $CH_2$ ), 1.82 (m, 2H,  $CH_2$ ), 2.26 (t,  $^3J = 7.4$  Hz, 2H,  $C=OCH_2$ ), 3.37 (t,  $^3J = 6.8$  Hz, 2H,  $BrCH_2$ ), 4.09 (q,  $^3J = 7.1$  Hz, 2H,  $CH_3-CH_2$ ); MS (MALDI; dnb):  $m/z = 251$  [M] $^+$ .

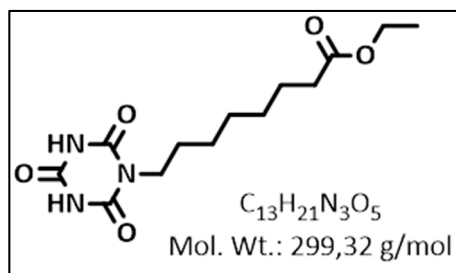

A suspension of 1.00 g (3.98 mmol) Ethyl 8-bromooctanoate, 1.03 g (7.96 mmol) cyanuric acid and 0.59 mL (3.98 mmol) DBU in 30 mL dry DMF was heated at 70 °C under inert gas atmosphere for 20 h. After cooling, the yellow solution was poured into 100 mL cold water. The resulting white precipitate was extracted with 3  $\times$  100 mL EtOAc. The organic phase was dried over  $MgSO_4$ . Then, the raw product was adsorbed on silica and purified by flash column chromatography ( $SiO_2$ , cyclohexane/ethyl acetate 1:1). The desired compound was obtained as white solid. Yield: 0.94 g (2.79 mmol; 79%);  $^1H$ -NMR ( $CDCl_3$ , 400 MHz, rt):  $\delta$  [ppm] = 1.23 (t,  $^3J = 7.1$  Hz, 3H,  $CH_3$ ), 1.30 (m, 6H,  $CH_2$ ), 1.59 (m, 4H,  $CH_2$ ), 2.26 (t,  $^3J = 7.4$  Hz, 2H,  $C=OCH_2$ ), 3.81 (t,  $^3J = 6.8$  Hz, 2H, CyAc- $CH_2$ ), 4.08 (q,  $^3J = 7.1$  Hz, 2H,  $CH_3-CH_2$ ), 9.14 (br, 2H, N-H).  $^{13}C$ -NMR ( $CDCl_3$ , 100 MHz, rt):  $\delta$  [ppm] = 173.94 (1C,  $OC=O$ ), 149.06 (1C,  $NHC=ONH$ ), 147.97 (1C,  $NC=O$ ), 60.26 (1C,  $CH_2CH_3$ ), 41.97 (1C,  $CH_2$ ), 34.27 (1C,  $CH_2$ ), 28.90 (1C,  $CH_2$ ), 28.76 (1C,  $CH_2$ ), 27.64 (1C,  $CH_2$ ), 26.34 (1C,  $CH_2$ ), 24.79 (1C,  $CH_2$ ), 14.22 (1C,  $CH_3$ ); MS (MALDI, om):  $m/z = 299$  [M] $^+$ ; IR (ATR):  $\tilde{\nu}_{max}$  [ $cm^{-1}$ ] = 3204, 3083, 2931, 2861, 1764, 1729, 1681, 1465, 1415, 1373, 1176, 792, 761, 547.

## (2) Supramolecular Coupling

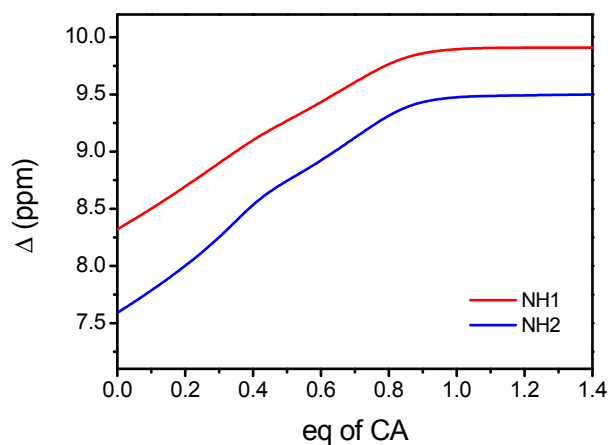

**Figure S5.** Hyp-NMR fitted binding isotherm of 2 and 5, derived from <sup>1</sup>H-NMR-titration data.

## (3) Surface Functionalization

BET analysis ZnO nanorods

Quantachrome NovaWin—Data Acquisition and Reduction for NOVA instruments

©1994–2007, Quantachrome Instruments—version 10.0

| Analysis         |                       | Report        |                       |                |                     |
|------------------|-----------------------|---------------|-----------------------|----------------|---------------------|
| Sample Desc      | 1                     | Comment       | 120 °C, 2 h           |                |                     |
| Sample weight    | 0.185 g               | Sample Volume | 0 cc                  |                |                     |
| Outgas Time      | 2.0 h                 | Outgas Temp.  | 120.0 C               |                |                     |
| Analysis gas     | Nitrogen              | Bath Temp.    | 77.3 K                |                |                     |
| Press. Tolerance | 0.100/0.100 (ads/des) | Equil time    | 60/60 s (ads/des)     | Equil timeout  | 240/240 s (ads/des) |
| Analysis Time    | 92.2 mi               | Cell ID       | 0                     |                |                     |
| Adsorbate        | Nitrogen              | Temperature   | 77.350 K              |                |                     |
| Molec. Wt.       | 28.013 g              | Cross Section | 16.200 Å <sup>2</sup> | Liquid Density | 0.808 g/cc          |

| Relative/Pressure (P/Po) | Volume @ STP (cc/g) | 1/[W((Po/P) - 1)] |
|--------------------------|---------------------|-------------------|
| $4.97760 \times 10^{-2}$ | 3.1309              | 13.387            |
| $1.17470 \times 10^{-1}$ | 4.2780              | 24.895            |
| $1.76212 \times 10^{-1}$ | 4.9801              | 34.366            |
| $2.38835 \times 10^{-1}$ | 5.5625              | 45.133            |
| $2.99066 \times 10^{-1}$ | 6.0434              | 56.488            |

### BET Summary

Slope = 171.668

Intercept = 4.594

Correlation coefficient,  $r = 0.999635$

C constant = 38.370

Surface Area = 19.758 m<sup>2</sup>/g

TGA measurements of functionalized ZnO nanorods

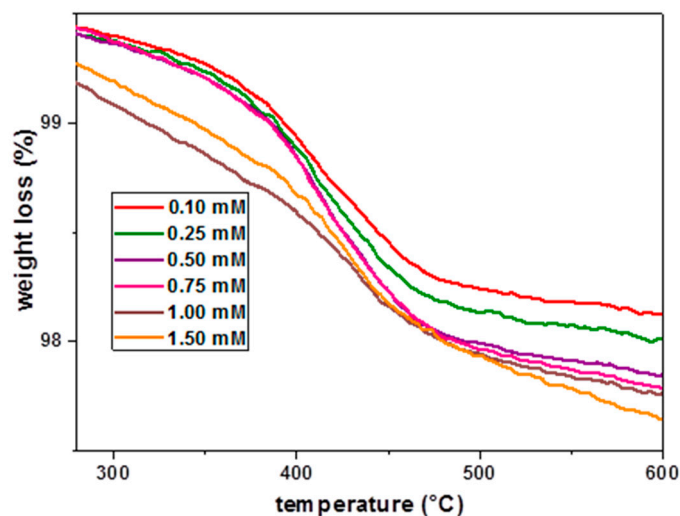

**Figure S6.** TGA of [ZnO-HR], functionalized with different concentrations of HR 4. (TGA performed under N<sub>2</sub> and O<sub>2</sub> gas flow; heat rate 10 K/min).

**Table S1.** Calculation of grafting densities of [ZnO-HR] from TGA data: grafting density =  $\left(\frac{\text{wt}}{100-\text{wt}}\right) \left(\frac{6.022 \times 10^{23}}{M_w \times \text{SSA}}\right)$ . wt: weight loss from TGA (%); M<sub>w</sub> of 4; SSA: 19.76 m<sup>2</sup>/g.

| Concentration (mM) | Organic Mass Loss (TGA) (%) | Grafting Density (molecules/nm <sup>2</sup> ) |
|--------------------|-----------------------------|-----------------------------------------------|
| 0.10               | 1.37                        | 0.608                                         |
| 0.25               | 1.91                        | 0.839                                         |
| 0.50               | 2.21                        | 0.967                                         |
| 0.75               | 2.47                        | 1.082                                         |
| 1.00               | 2.55                        | 1.118                                         |
| 1.50               | 2.62                        | 1.151                                         |

**Table S2.** Theoretical grafting density of adsorbates on ZnO nanorods (calculated for wet-chemical functionalization in MeOH-density = 0.8 g/mL and with SSA = 19.76 m<sup>2</sup>/g).

| Grafting Density (molecules/nm <sup>2</sup> )                                   | 1      | 2      | 3      | 4      | 5      | 6      | 7      |
|---------------------------------------------------------------------------------|--------|--------|--------|--------|--------|--------|--------|
| molecules needed for full coverage (E+18)<br>(per 25 mL of 0.15 wt% – solution) | 0.5928 | 1.1856 | 1.7784 | 2.3712 | 2.9640 | 3.5568 | 4.1496 |

**Table S3.** Calculation of amount of employed molecules for wet-chemical surface functionalization.

| Concentration (mM) | Molecules Employed for Functionalization (E+18) | Concentration (mM) | Molecules Employed for Functionalization (E+18) |
|--------------------|-------------------------------------------------|--------------------|-------------------------------------------------|
| 0.025              | 0.3764                                          | 1.00               | 15.055                                          |
| 0.05               | 0.7528                                          | 1.50               | 22.583                                          |
| 0.10               | 1.5055                                          | 2.00               | 30.111                                          |
| 0.20               | 3.0111                                          | 3.00               | 45.166                                          |
| 0.25               | 3.7638                                          | 6.00               | 90.332                                          |
| 0.30               | 4.5166                                          | 12.00              | 180.66                                          |
| 0.60               | 9.0332                                          | 25.00              | 376.38                                          |

Interpretation of UV-Vis data:

The grafting density was calculated from UV-vis by employing the following formula:

$$\theta = \left( \frac{(\text{Abs}_{302\text{nm}} - \text{Abs}_{302\text{nm}}(\text{ZnO})) \times V}{\epsilon \times d} \right) \times \left( \frac{6.022 \times 10^{23}}{\text{SA}} \right)$$

Abs<sub>302nm</sub>: measured absorption; Abs<sub>302nm</sub>(ZnO): bandgap absorption of ZnO; E: extinction coefficient of Hamilton receptor 4 at 302 nm: 54,861 L·mol<sup>-1</sup>·cm<sup>-1</sup>; D: diameter UVvis cuvette: 1 cm; V: volume in UVvis cuvette: 2 mL; SA: surface area of ZnO nanorods in 2 mL UV-solution (~2.4 μg·rods): 47.42 × 10<sup>12</sup> nm<sup>2</sup>.

Calculation of Langmuir Adsorption isotherm

Formula Langmuir isotherm:

$$\theta = \frac{c \times \theta \text{ max}}{K(\text{des}) + c}$$

Linear form Langmuir isotherm:

$$\frac{1}{\theta} = \frac{K(\text{des})}{(\theta \text{ max})} + \frac{1}{\theta \text{ max}}$$

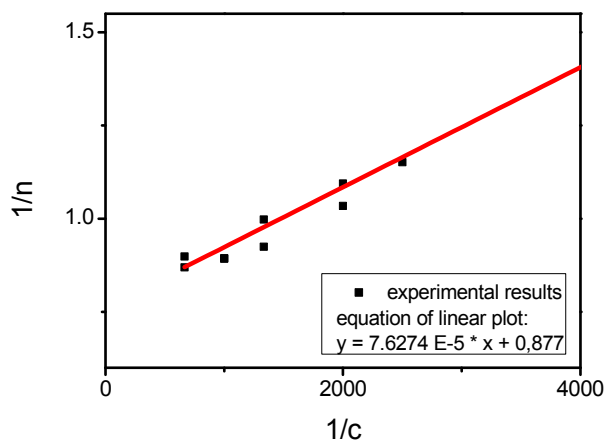

**Figure S6.** Linear plot of experimental results with corresponding equation.

Calculation of maximum monolayer grafting density:

$$\theta (\text{max}) = \frac{1}{0.877} = 1.14025$$

Calculation of the adsorption constant for the grafting of ZnO nanorods with catechol 4 in methanol:

$$K(\text{ads}) = 1/(7.6274 \times 10^{-5} \times \theta_{\text{max}}) = 11,498$$

Insertion of K(ads) and n(max) leads to calculated Langmuir isotherm:

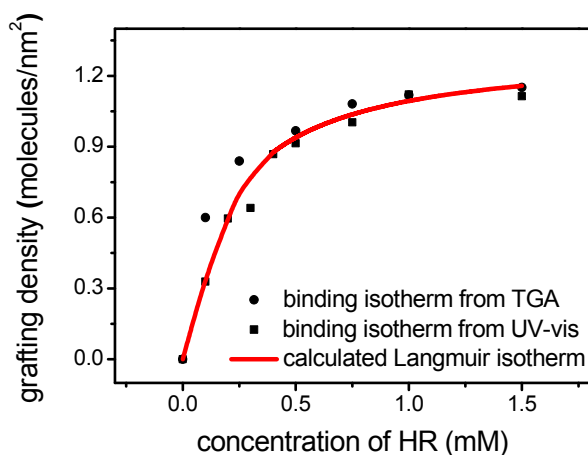

**Figure S7.** Calculated Langmuir isotherm.

#### (4) Hybrid formation

**Table S4.** DLS-measurements of ZnO, ZnO-HR and ZnO-HR-CA.

| Sample<br>(Measured in Chloroform) | Hydrodynamic Diameter<br>(from DLS) (in nm) | Standard Deviation<br>(in nm) |
|------------------------------------|---------------------------------------------|-------------------------------|
| [ZnO]                              | 141.9                                       | 4.9                           |
| [ZnO-HR]                           | 158.5                                       | 5.0                           |
| [ZnO-HR-CA]                        | 167.0                                       | 3.8                           |

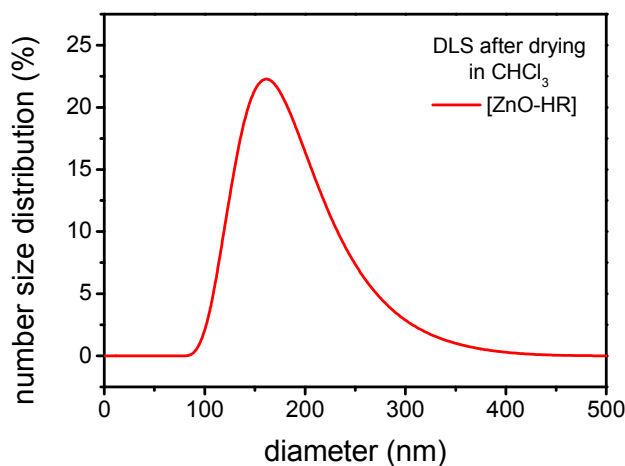

**Figure S8.** DLS-measurement of [ZnO-HR] after centrifugation and drying (80 °C) for 24 h.

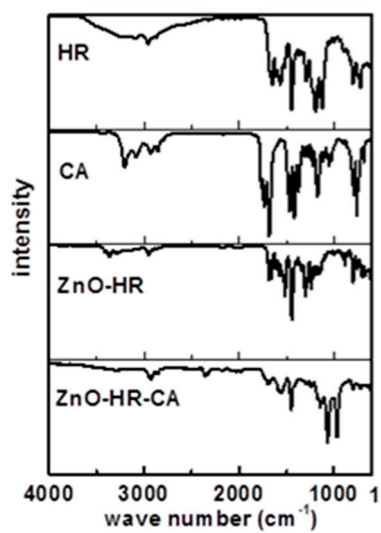

**Figure S9.** IR spectra of ZnO, ZnO-HR and ZnO-HR-CA.

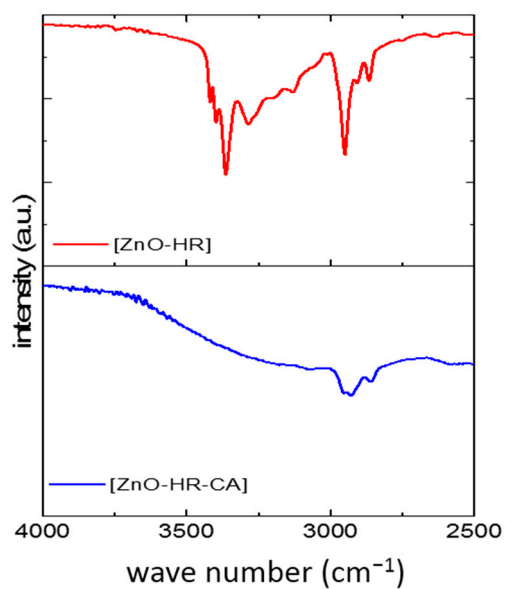

**Figure S10.** IR spectra ZnO-HR and ZnO-HR-CA; magnified region displays broadening of the NH-IR-vibrations upon H-bond formation.
